# Supplementary material
Source: PubMed Central journal article supplement (PMC2290797)

Activities leading to the first infection in a household  
a. No intervention [AR = 36.6%]

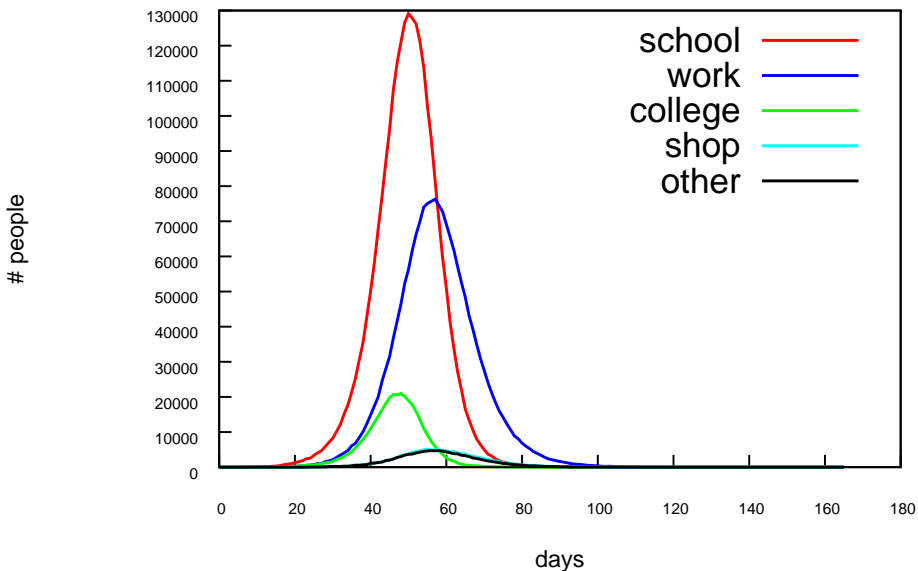

b. Close schools at 0.01% (day 20)  
[AR = 1.7%]

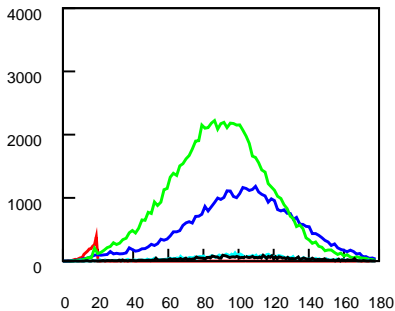

c. Close schools at 0.1% (day 30)  
[AR=2.0%]

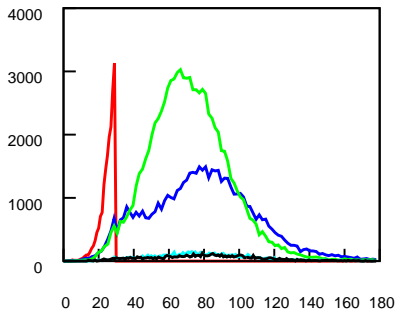

Supplement: pnas_0706849105_2.pdf [file pnas_0706849105_2.pdf]
