# Supplementary material
Source: PubMed Central journal article supplement (PMC2290797)

Case 2, Table 3, R0=2.1, Trigger=0.1%

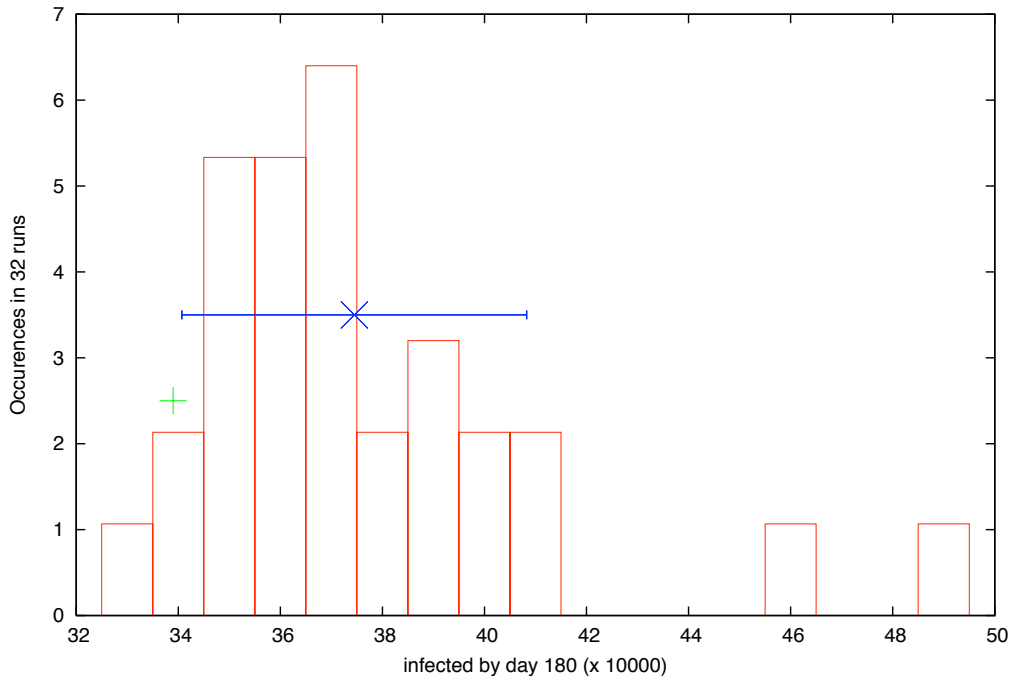

Supplement: pnas_0706849105_1.pdf [file pnas_0706849105_1.pdf]

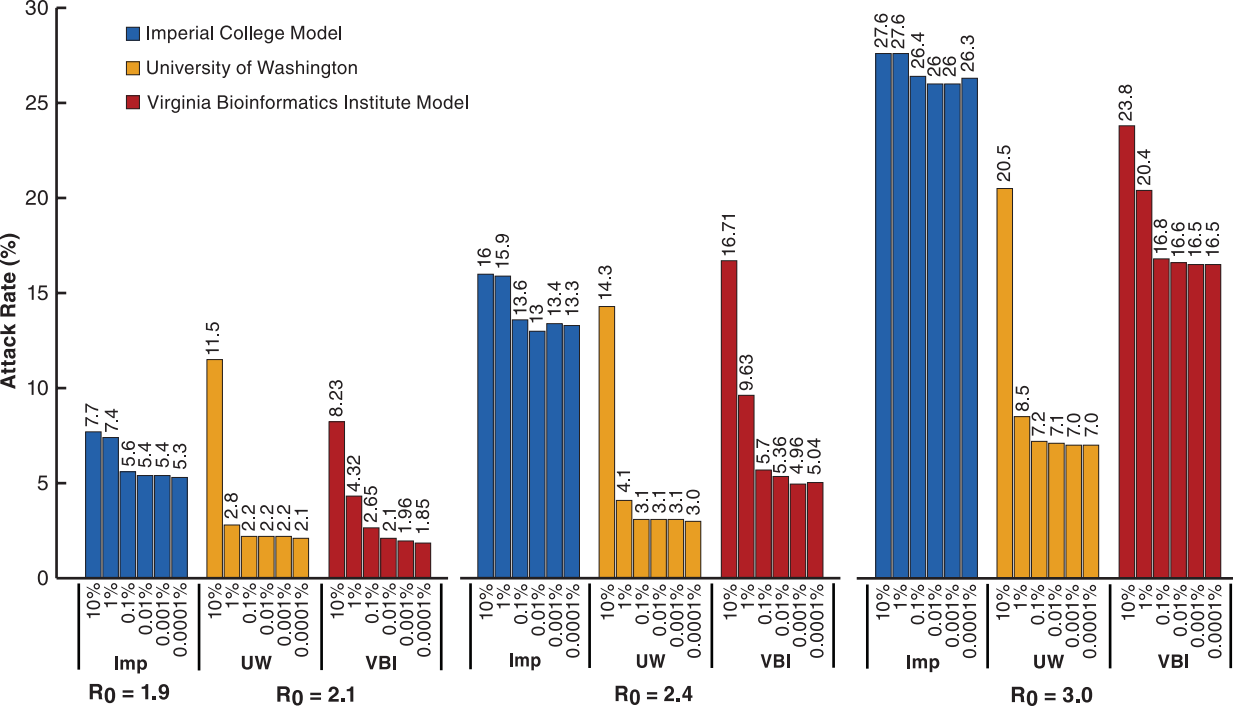

Supplement: pnas_0706849105_3.pdf [file pnas_0706849105_3.pdf]
